# Supplementary material
Source: Springer Nature journal article supplement (https://www.springermedizin.de/resource/supplementary/12958_2008_417_MOESM7_ESM.pdf/9567834)

## A. Ovary

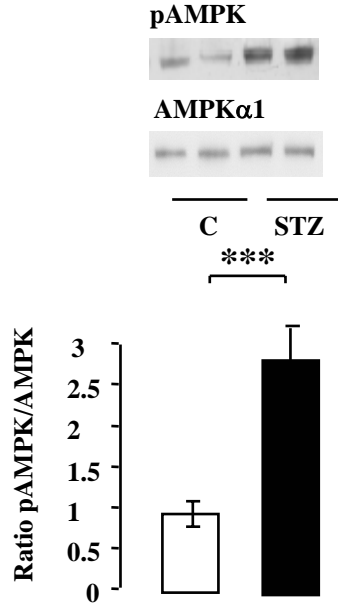

## B. Muscle

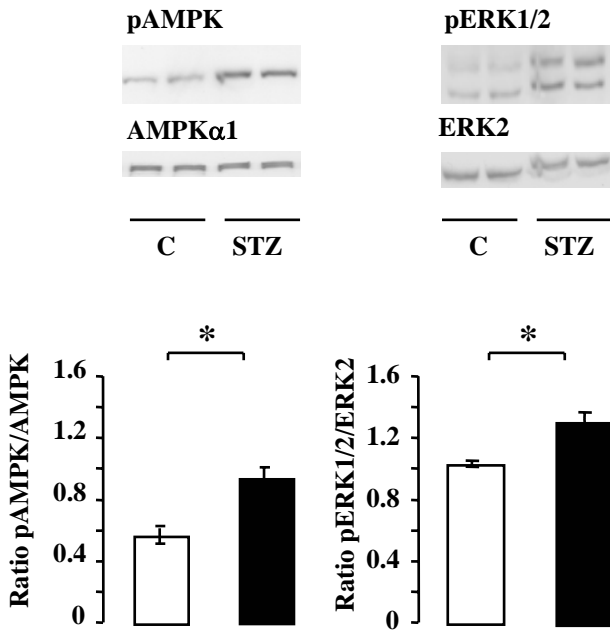

## C. Liver

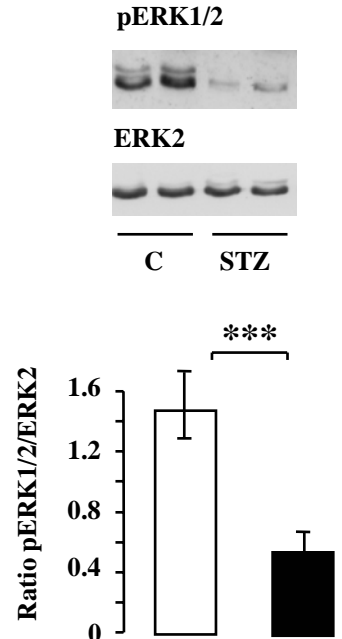

Supplement: MOESM7 [file 9567834]
